1 Network analysis of mass spectrometry  
2 imaging data from colorectal cancer  
3 identifies key metabolites common to  
4 metastatic development.

5

6 Paolo Inglese<sup>1</sup>, Nicole Strittmatter<sup>1</sup>, Luisa Doria<sup>1</sup>, Anna Mroz<sup>1</sup>, Abigail Speller<sup>1</sup>, Liam Poynter<sup>1</sup>,  
7 Andreas Dannhorn<sup>1</sup>, Hiromi Kudo<sup>2</sup>, Reza Mirnezami<sup>1</sup>, Robert D Goldin<sup>3</sup>, Jeremy K Nicholson<sup>1</sup>, Zoltan  
8 Takats<sup>1†</sup>, Robert C Glen<sup>1,4†</sup>

9 <sup>1</sup> Department of Surgery and Cancer, Division of Integrative Systems Medicine and Digestive  
10 Diseases, Imperial College London, SW7 2AZ London (UK)

11 <sup>2</sup> Department of Medicine, Imperial College London, SW7 2AZ London (UK)

12 <sup>3</sup> Centre for Pathology, Imperial College, W2 1NY London (UK)

13 <sup>4</sup> Centre for Molecular Informatics, Department of Chemistry, University of Cambridge, CB21EW  
14 Cambridge (UK)

15 †Contributed equally, correspondence to be addressed to [z.takats@imperial.ac.uk](mailto:z.takats@imperial.ac.uk) and  
16 [r.glen@imperial.ac.uk](mailto:r.glen@imperial.ac.uk)

## 17 Abstract

18 A deeper understanding of inter-tumor and intra-tumor heterogeneity is a critical factor for the  
19 advancement of next generation strategies against cancer. The heterogeneous morphology exhibited  
20 by solid tumors is mirrored by their metabolic heterogeneity. Defining the basic biological mechanisms  
21 that underlie tumor cell variability will be fundamental to the development of personalized cancer  
22 treatments. Variability in the molecular signatures found in local regions of cancer tissues can be  
23 captured through an untargeted analysis of their metabolic constituents. Here we demonstrate that  
24 DESI mass spectrometry imaging (MSI) combined with network analysis can provide detailed insight  
25 into the metabolic heterogeneity of colorectal cancer (CRC). We show that network modules capture  
26 signatures which differentiate tumor metabolism in the core and in the surrounding region. Moreover,  
27 module preservation analysis of network modules between patients with and without metastatic  
28 recurrence explains the inter-subject metabolic differences associated with diverse clinical outcomes  
29 such as metastatic recurrence.

## 30 Significance

31 Network analysis of DESI-MSI data from CRC human tissue reveals clinically relevant co-expression ion  
32 patterns associated with metastatic susceptibility. This delineates a more complex picture of tumor  
33 heterogeneity than conventional hard segmentation algorithms. Using tissue sections from central  
34 regions and at a distance from the tumor center, ion co-expression patterns reveal common features  
35 among patients who developed metastases (up of > 5 years) not preserved in patients who did not  
36 develop metastases. This offers insight into the nature of the complex molecular interactions  
37 associated with cancer recurrence. Presently, predicting CRC relapse is challenging, and  
38 histopathologically like-for-like cancers frequently manifest widely varying metastatic tendencies.  
39 Thus, the methodology introduced here more robustly defines the risk of metastases based on tumor  
40 biochemical heterogeneity.

## 41 Author contributions

42 P.I., Z.T., R.C.G.: designed the study, developed the workflow, analyzed the data, interpreted the  
43 results, wrote the paper; N.S. collected the MS, performed the H&E staining, wrote the paper; L.D.:  
44 interpreted the results, wrote the paper; A.M.: collected the MS; A.S.: histological assessment; L.P.:  
45 collected the tissue specimens and clinical metadata; A.D.: collected the MS; H.K.: performed the  
46 H&E staining; R.M.: collected the tissue specimens and clinical metadata. R.G.: histological  
47 assessment; J.K.N: designed the study, edited the paper.

## 48 Introduction

49 Cancerous tissue is characterized by a high level of heterogeneity when compared to the surrounding  
50 host tissue. This heterogeneity, expressed at multiple levels, may be purely genetic (Burrell,  
51 McGranahan et al. 2013) or epigenetic (Marusyk, Almendro et al. 2012) or a combination, and  
52 represents one of the most challenging aspects for the implementation of effective anti-cancer  
53 treatment strategies. In earlier work, mass spectrometry imaging (MSI) techniques have shown  
54 promise in their ability to capture the diversity of tumors through the analysis of molecular expression  
55 patterns (Schwartz, Weil et al. 2004, Eberlin, Dill et al. 2010, McDonnell, Corthals et al. 2010,  
56 Schwamborn and Caprioli 2010, Eberlin, Norton et al. 2012, Alexandrov, Becker et al. 2013), showing  
57 that the underlying heterogeneity is reflected in dramatic metabolic changes across different tumor

58 sub-regions. From the point of view of statistical modelling, the lack of detailed metabolic data of the  
59 heterogeneous properties of cancerous tissues and the difficulty of detecting those differences  
60 through visual inspection of the specimens makes necessary the use of analytical methods combined  
61 with unsupervised analysis techniques. These approaches can detect the underlying statistical  
62 structure of the data and can be employed to cluster molecular abundance patterns that are found to  
63 be common among discrete regions of tissues. These subsets can be defined both in the spatial domain  
64 (pixels) and in the metabolic domain (ions corresponding to molecules) and both approaches have  
65 been explored in previous work for the study of cancer and other types of tissues. Linear methods,  
66 such as PCA or MDS, combined with hierarchical clustering have shown that MALDI-MSI can capture  
67 the heterogeneity of cancer while allowing analysis of the properties of the metabolic space  
68 (Deininger, Ebert et al. 2008, Rauser, Marquardt et al. 2010), whereas other approaches based on the  
69 combination of multiple clustering methods base their results on the presence of concordance  
70 between the spatial patterns associated with clusters (pixels) (Jones, van Remoortere et al. 2011,  
71 Balluff, Frese et al. 2015). Other studies have associated the presence of specific sets of molecules in  
72 the cancerous tissue with clinical outcome (e.g. increased risk of mortality or metastasis development)  
73 (Abdelmoula, Balluff et al. 2016, Lou, Balluff et al. 2016). However, the conclusions from this earlier  
74 work are often limited to providing a series of possible biomarkers for tumor heterogeneity - limited  
75 or no insight is given into the possible biochemical mechanisms related to the increased/decreased  
76 abundance of identified markers in a specific region of the tissue.

77 We hypothesize that the mechanisms behind tumor heterogeneity are much more complex than  
78 those captured simply by the identification of sets of locally highly abundant metabolites and, for this  
79 reason, it is extremely important to introduce methodologies capable of capturing a broader view of  
80 the underlying biochemical interactions. Network analysis represents a natural choice in this regard,  
81 since it provides a set of tools to describe the possible interactions (co-expressions) between variables  
82 in terms of their mutual statistical similarities. In the present study, we have characterized the  
83 metabolic differences between patients with or without metastatic recurrence using weighted co-  
84 expression network analysis (WGCNA) (Langfelder and Horvath 2008) module preservation  
85 (Langfelder, Luo et al. 2011). Previous studies have applied a WGCNA approach to metabolic data  
86 (DiLeo, Strahan et al. 2011, Su, Wang et al. 2014, Yu, Niu et al. 2015) and, specifically, several studies  
87 have made use of module preservation as a measure for the identification of (gene) expression  
88 differences between species or disease conditions (Oldham, Horvath et al. 2006, Miller, Horvath et al.  
89 2010, Horvath, Zhang et al. 2012, Chen, Cheng et al. 2013, Tong, Li et al. 2013, Xue, Huang et al. 2013,  
90 Huang, Maruyama et al. 2014) but, to the best of our knowledge, this is the first application to MSI  
91 data derived from cancerous tissue specimens. A related study uses correlations to evaluate the ion  
92 co-localization in MSI data (McDonnell, van Remoortere et al. 2008). The hypothesis underlying the  
93 present study is that network modules can represent different aspects of the local metabolism  
94 through the analysis of co-localized ions and that the metabolic differences characterizing tumor  
95 aggressiveness can be identified by those modules associated with patients with metastases that are  
96 (or are not) preserved in patients without metastases.

97 For both the data collected at the tumor core and at a distance of 10cm from the tumor, two groups  
98 of patients are defined: a *control cohort* consisting of patients with metastatic recurrence and a *test*  
99 *cohort* consisting of those patients without metastatic recurrence. Using WGCNA, an ion network can  
100 be constructed using the mass spectral data from instances where the variables have stronger  
101 connections if co-localized (correlated). However, in contrast to gene expression analysis, where each

102 sample can be treated individually, MSI data from a single patient specimen often consists of  
103 thousands of mass spectral profiles (one for each pixel). This, together with the different number of  
104 patients belonging to the two cohorts, may result in a significantly different number of spectra  
105 associated with the two clinical outcomes. Furthermore, treating the spectra as independent  
106 measures does not guarantee that the correlations reflect the co-expression levels of the ions within  
107 each individual tissue specimen.

108 For these reasons, a comparative analysis is performed using a consensus cohort network, defined by  
109 merging the tissue sample networks from a single cohort. A set of modules are defined by partitioning  
110 the consensus network into sub-networks of highly correlated nodes and the metabolic differences  
111 between the two cohorts are characterized in terms of module preservation.

112 In this study, the WGCNA module preservation analysis on DESI-MSI data from specimens surgically  
113 removed at the tumor center and at a distance of 10cm from the tumor center (Table 1) shows, using  
114 no prior information about the nature of the local tissue (tumor, surrounding healthy tissue or  
115 background), that the metastasis associated metabolic patterns within the tumor core  
116 microenvironment involve not only the cancerous tissue, but are extended to the neighboring stromal  
117 tissue and furthermore, that metastasis associated differences (albeit different ones) in the cellular  
118 metabolism are also detected in regions relatively distant from the tumor.

## 119 Results

### 120 Re-calibration of peak positions, visual assessment of sample quality and ion selection.

121 The peak lists (centroid data), extracted from the RAW data using the ProteoWizard software  
122 (Kessner, Chambers et al. 2008) were re-calibrated in order to reduce the peak shifts arising from  
123 specific instrumental conditions during the MS acquisition. Since a dedicated reference compound for  
124 lock-mass correction was not infused during the MS measurement process, a re-calibration procedure  
125 was introduced exploiting the characteristics of the analyzed data. Two ions were identified as  
126 reference candidates because of their standard abundance across all the samples: palmitate ion,  
127 corresponding to 255.2330  $m/z$  ( $[M-H]$ ), was found homogeneously occurring in the entire layer  
128 containing both the tissue and the background; whereas phosphatidylinositol, PI(38:4), corresponding  
129 to 885.5499  $m/z$  ( $[M-H]$ ) was mainly found in the region occupied by the tissue. Using these two  
130 reference ions, the  $m/z$  shift across the entire sample could be estimated. Setting a 1  $\Delta ppm$  wide  
131 search window, the intensity of the closest peak to the reference ions was associated with each pixel;  
132 if no peak was found within the search window, the pixel was left blank. Because of the characteristics  
133 of the two reference ions, it was expected that the intensity of the image corresponding to palmitic  
134 acid would cover the entire layer whereas the image corresponding to PI(38:4) would clearly represent  
135 the tissue sample. If the value of  $\Delta ppm$  was too small, the matched ions intensity image would instead  
136 present holes or scattered pixels. In this way, after scanning increasing values of  $\Delta ppm$  in steps of  
137 1ppm, the optimal  $\Delta ppm$  was defined as the minimum value to produce images defined as having no  
138 more than 1% of missing pixels for the palmitic acid image and a clear tissue image for PI(38:4) (Fig.  
139 1A-F). If the optimal  $\Delta ppm$  was larger than 10ppm (more than double the instrumental error), then  
140 the quality of the sample was considered insufficient and the sample was discarded. Subsequently,  
141 the  $m/z$  values found in the search window corresponding to the palmitate peak were used to quantify  
142 the peak shift across all the pixels. A robust Locally Weighted Scatterplot Smoothing (LOWESS) model  
143 was used to estimate the relative distance between the RAW peak positions and the expected  $m/z$   
144 value (255.2330  $m/z$ ) (Fig. 1G). Only the palmitic acid was used to estimate the peak shifts; for this  
145 ion, the LOWESS model was also capable of estimating the peak shift in the presence of a small number

146 of blank pixels, whereas it failed to estimate the peak shift for PI(38:4) because of the large number  
147 of consecutive blank pixels (Fig. 1H). The estimated peak shift was used to re-calibrate all the spectra,  
148 applying a rigid translation of the  $m/z$  values, so that the  $m/z$  values corresponding to palmitic acid  
149 were set equal to the theoretical value. While this approach gave satisfactory results for Orbitrap data,  
150 the same algorithm cannot be directly used for the correction of time-of-flight data.

151 After peak matching (SI Appendix, Materials and Methods), in order to compare the different co-  
152 occurrence patterns, only the ions present in all the samples in at least 1% of the pixels were used.  
153 Additionally, in order to consider only the biological correlation patterns, isotopes were identified and  
154 removed. An ion at an  $m$   $m/z$  position was denoted as an isotope if there existed another ion at  $m_0$  in  
155 the matched ions list such that  $m \in [m_0 - 1.003 k, m_0 + 1.0045 k]$ , with  $k \in \mathbb{N}$  and such that it  
156 could not be annotated using an error threshold of 5 ppm were checked.

### 157 Modelling the biochemical differences between groups of patients through the non-preserved 158 network ion modules.

159 In all experimental analyses, two patients' cohorts were defined: the *reference cohort*,  $X_{met}$ , consisting  
160 of those patients that showed clinical outcomes of interest (developed metastasis), and the *test*  
161 *cohort*,  $X_{non-met}$ , consisting of those patients who did not develop metastasis during the follow-up  
162 period. The assumption behind this procedure was that the differences in ion abundances in local  
163 regions of the tissue reflected metabolic heterogeneity and that differences in metabolic pathways  
164 occurring in the cancer cells were associated with a different clinical outcome. In order to calculate a  
165 representative network for each cohort, the definition of a consensus network was used (Langfelder  
166 and Horvath 2008). A signed adjacency (SI Appendix, Materials and Methods) was calculated from  
167 each tissue specimen of the cohort, and combined into a single matrix whose elements were defined  
168 as the corresponding minimum value across all the cohort samples. The soft power  $\beta$ , necessary to  
169 calculate the signed topological overlap matrix (TOM) was determined as the smallest integer  
170 corresponding to a  $R^2 \geq 0.8$  ( $R^2 \geq 0.7$  for 10cm samples) for the scale-free network assumption for  
171 both  $X_{met}$  and  $X_{non-met}$  in a range of 1 to 20. Using the same value of  $\beta$  aimed to preserve the  
172 compatibility between the control and test networks. In a similar way, the consensus TOM from the  
173 only control data, denoted  $TOM_{met}$ , was defined as the matrix whose elements were equal to the  
174 corresponding minimum values across the TOMs of the cohort (SI Appendix, Materials and Methods).

175 In order to obtain a partition of disjoint sets of highly correlated ions (denoted *reference modules*) in  
176 the reference network, a hierarchical clustering with average linkage on the  $TOM_{met}$  based distance  
177 matrix was applied. The distance matrix, calculated as  $1 - TOM_{met}$ , represented the dissimilarities  
178 between the ion expressions within the metastatic tissue specimens. The optimal partition was  
179 identified using the Dynamic Tree Cut hybrid algorithm (Langfelder, Zhang et al. 2008) with a minimum  
180 number of ions per cluster equal to 5. The latter choice was based on the hypothesis that small clusters  
181 could capture a more detailed picture of the spatial similarities in the molecular expressions. The  
182 module eigenmetabolites (ME) (in a similar fashion to the module eigengenes of the original WGCNA  
183 algorithm, these were defined as the scores of the first principal component of the MSI data limited  
184 to the module ions) defined the representative spatial distribution of the ions belonging to the  
185 module. In order to reduce the potential redundancy of similar ion modules, those modules where  
186 the MEs were characterized by a Pearson's correlation larger than 0.8 were merged into a single  
187 module. The ions that were not clustered (because they were assigned to modules with less than 5  
188 ions) were assigned to the "grey" module and were not passed to the next stage of the analysis. In  
189 this way, a set of modules were associated to the consensus network, representing the observed  
190 molecular heterogeneity of the cancerous tissue. The metabolic differences between the reference  
191 cohort of patients and test cohort of patients were determined by module preservation analysis (SI

192 Appendix, Materials and Methods). The  $X_{met}$  consensus network modules were tested for preservation  
193 in the  $X_{non-met}$  consensus network, under the hypothesis that not-preserved modules would capture  
194 the metabolic differences associated with the patients' prognosis.

### 195 Phosphatidylglycerol metabolism in stromal tissue surrounding the tumor core is 196 associated with metastasis.

197 The mass spectral data from the tumor core specimens of 32 subjects (Table 1) was used to perform  
198 the module preservation analysis. The MSI data from the 8 patients that developed metastasis,  
199 denoted  $X_{met}^{(core)}$ , was used to define the consensus reference network, while the remaining 24  
200 patients' MSI data, denoted  $X_{non-met}^{(core)}$ , was used to build the test network. The high correlation  
201 between their node connectivity  $k$ , defined as the sum of the node edges strengths (Oldham, Horvath  
202 et al. 2006), (Pearson's  $r = 0.95$ , Fig. 2A) showed that the two networks were characterized by similar  
203 global properties. This result showed that the global tumor metabolism was undifferentiated between  
204 the two groups of patients. By partitioning the  $TOM_{met}^{(core)}$  using the hierarchical clustering, 6 reference  
205 modules were found (denoted as "blue", "brown", "green", "red", "turquoise" and "yellow") (Fig. 2A).  
206 A visual inspection of the ME images showed that 4 modules were associated with the tissue and 2  
207 were localized mainly outside of the tissue (Fig. S2). Moreover, it was seen that 3 modules captured  
208 different tumor sub-regions and one module was mainly expressed in the stromal connective tissue  
209 (Fig. 3A). The combination of the relative intensities of the MEs localized within the tumor region  
210 revealed the complex spatial patterns associated with its molecular heterogeneity (Fig 3A). The  
211 module preservation analysis (5,000 permutations) showed that 4 of the 6 metastatic network  
212 modules were from weakly to moderately preserved in the  $X_{non-met}$  network. Among those, the green  
213 module was associated with tissue and was weakly preserved ( $Z_{summary} \lesssim 5$ ) in the  $X_{non-met}$  data (Fig.  
214 S1A). The relatively lower correlation (Pearson's  $r = 0.65$ ) between the  $X_{met}^{(core)}$  and  $X_{non-met}^{(core)}$  module  
215 membership ( $kME$ ), defined as the correlation between the ions intensities and the ME, confirmed  
216 that the green module ions were not equally co-localized in the two datasets (Fig. S1A). The projection  
217 of its ME intensities on the optical image of the H&E stained tissue showed that the green module  
218 ions involved the stromal tissue segment of the tumor with the observed presence of free fat droplets  
219 and infiltrations of tumor cells (an example is reported in Fig 4A). Noticeably, the MEs revealed that  
220 the green module ions were also expressed in the  $X_{non-met}^{(core)}$  samples (Fig. S3) confirming that the  
221 relevant biochemical differences could be captured only in terms of different molecular interactions  
222 (network edge weights) and not in terms of presence/absence of certain sets of ions. Analyzing the  
223 corresponding regions in the optical images of the H&E stained tissue, it was observed that this  
224 module corresponded to regions close to the necrotic tissue (an example is reported in Fig. 4B).

225 The ion annotation, performed through a Metlin database search (Smith, O'Maille et al. 2005),  
226 revealed that those of the weakly preserved green module consisted of phosphatidylglycerols (PG)  
227 and fatty acids (FA) (Fig 5A, Table S1). Specifically, hexadecanoic acid (C16:0), eicosatetraenoic acid  
228 (C20:4), docosatetraenoic acid (C22:4), docosapentaenoic acid (C22:5), docosahexaenoic acid (C22:6)  
229 and tetracosapentaenoic acid (C24:5) which showed high correlation with the distribution of PG(36:3),  
230 PG(36:4), PG(38:5), PG(38:6), PG(40:6), PG(40:7) and the non-annotated 292.2432, 528.2736 and  
231 791.5441  $m/z$  ions. The ion pair specificity (SI Appendix, Materials and Methods), confirmed that most  
232 of the PGs together with tetracosapentaenoic acid were specific of the  $X_{met}^{(core)}$  sample set (Fig. 5A).

233 Confirmation of the different network properties between the discovery and test datasets was  
234 obtained by running WGCNA directly on the  $X_{non-met}^{(core)}$  samples. Indeed, it was seen that the green  
235 module ions were split into two different non-metastatic modules (Fig. S4C). Most of the FAs were



236 assigned to a different module together with phosphatidylethanolamines (PEs), phosphatidylinositols  
237 (PIs) and phosphoserines (PSs) (Table S2, Fig. S4D). The PGs were instead assigned together in a larger  
238 module consisting of only phospholipids (Table S3, Fig. S4E).

### 239 Phospholipid metabolism is different at 10cm from the tumor core of metastatic and 240 non-metastatic patients.

241 Analogous to the tumor core analysis, module preservation analysis was performed using the MSI data  
242 from tissue samples collected from surgical specimens at 10cm from the tumor core. The specimens  
243 from 29 patients (Table 1) were split into two groups corresponding to the occurrence/non-  
244 occurrence of a metastatic relapse during the follow-up period. The MSI data of the 6 patients who  
245 developed metastases, denoted  $X_{met}^{(10cm)}$ , were used to determine the reference network modules  
246 that were later tested for preservation in the remaining 23 patients MSI data ( $X_{non-met}^{(10cm)}$ ). As seen in  
247 the tumor center samples, the WGCNA consensus networks calculated from the mass spectral data  
248 from  $X_{met}^{(10cm)}$  and  $X_{non-met}^{(10cm)}$  were characterized by similar global properties (Pearson's  $r = 0.93$   
249 between metastatic and non-metastatic data  $k$ , Fig. 2B); this result also showed that in this case the  
250 two metabolic networks were globally almost identical. The metastatic related network was clustered  
251 in 6 modules (denoted "blue", "brown", "green", "turquoise", and "yellow") (Fig 2B). Analyzing the  
252 spatial distribution of the detected ME, it was observed that three of those modules showed were  
253 localized in the tissue of all 6 patients (Fig. S5). The combination of the relative intensity of those MEs  
254 revealed the molecular heterogeneity of the tissue sections (Fig. 3B). Using module preservation  
255 analysis with 5,000 permutations, it was observed that all the modules were from weakly to  
256 moderately preserved ( $2 \leq Z_{summary} \leq 10$ ). In particular, the brown module, expressed in the tissue,  
257 was weakly preserved ( $Z_{summary} \lesssim 5$ ) in the patients who did not develop metastasis. As observed  
258 in the tumor core data, the  $X_{met}^{(10cm)}$  and  $X_{non-met}^{(10cm)}$  the brown module  $kMEs$  showed a relatively lower  
259 correlation (Pearson's  $r = 0.74$ , Fig. S1B).

260 The annotation of the brown module ions, mainly expressed in the epithelium (as revealed by a  
261 comparison with the optical images of the H&E stained images, shown in Fig. 4C-D), consisted of  
262 different classes of phospholipids (PE, PG, PI, and PS) together with phosphatidic acids (PA),  
263 octadecadienoic acid (C18:2), eicosenoic acid (C20:1), eicosadienoic acid (C20:2), and eicosatetraenoic  
264 acid (C20:4) (Table S4). The ion pair significance showed that the phospholipid distributions showed  
265 stronger correlations in  $X_{met}^{(10cm)}$  than in  $X_{non-met}^{(10cm)}$  samples (Fig 5B), with PG(36:4) playing a central  
266 role in the metastatic network specific edges.

267 Running WGCNA directly on the  $X_{non-met}^{(10cm)}$  MSI data showed that most of the brown module ions were  
268 assigned to a more complex module, labelled "turquoise", together with different classes of  
269 phospholipids and FAs (Fig. S7A-C). Specifically, among the annotated ions, the most probable  
270 candidates for 281.2486, 279.233, 277.2174, 309.28, 306.2521  $m/z$  were identified to be n-9 oleic acid  
271 (C18:1), n-6 linoleic acid (C18:2), n-3/6  $\alpha/\gamma$ -linoleic acid (C18:3), n-9 eicosenoic acid (C20:1), n-6  
272 dihomogamma-linoleic acid (C20:3) and n-3 docosahexaenoic acid (C22:6); those ions were found co-  
273 localised with the phospholipids (Table S5, Fig. S7D).

274

## 275 Discussion

276 Understanding the mechanisms behind the heterogeneity of cancerous tissues is a key goal for the  
277 development of effective cancer treatment strategies (Murugaesu, Chew et al. 2013). In this study, a  
278 network based analysis of the co-localized ions allowed the identification of a set of tissue sub-types  
279 (ion modules) that represent the tissue heterogeneity associated with each individual subject. The  
280 WGCNA approach, combined with the Dynamic Tree Cut algorithm, determined the optimal number  
281 of tissue sub-types with no user intervention. The only parameter required, the minimum number of  
282 ions necessary to form a module, was set to 5 following the hypothesis that small clusters could  
283 capture finer details of the heterogeneous metabolic patterns. In order to detect the metabolic  
284 differences between the group-of-interest (patients developing metastasis) and the remaining part of  
285 the cohort, the modules detected were tested in the former for preservation in the latter group. The  
286 permutation test applied on MSI data at a distance of 10cm from the tumor core allowed the  
287 identification of one module associated with the development of metastasis in both the cases.

288 A set of molecular interactions involving PG and FAs was found to be representative of the increased  
289 risk of the development of metastases in the tumor core. Specifically, the combination of WGCNA and  
290 the differential network analysis showed that, in the metastatic tumor core set, PGs were more highly  
291 co-localized together with tetracosapentaenoic acid than in the non-metastatic related samples,  
292 suggesting a key role for these molecules in differentiating the local biochemical reactions. The  
293 presence of polyunsaturated fatty acids (PUFAs) in the “brown” module together with PGs suggests  
294 that these regions elicit significantly higher phospholipase A2 (PLA2) activity. This enables the  
295 formation of prostaglandins, in particular prostaglandin E2, through COX2 activity, which has widely  
296 been associated with tumor invasion and metastasis formation in a broad range of different cancers.  
297 cPLA2 activity itself has been found to contribute to metastasis formation in breast cancer *via* TGF  $\beta$ -  
298 induced epithelial-mesenchymal transition (EMT) (Chen, Fu et al. 2017).

299 PGs are generally considered to be membrane constituents of bacterial cells, serving mainly as  
300 surfactants in mammalian organisms. In this regard, the PGs detected are unlikely to be building blocks  
301 of cellular membranes in the tumor environment, but rather present in the interstitial space.  
302 Considering the apparent specificity of PLA2 for anionic phospholipids likely excreted into the  
303 extracellular space and the rich abundance of macrophages in association with the green module (Fig.  
304 4A), the underlying enzyme is probably the PLA2 produced by macrophages. Macrophage cPLA2 has  
305 already been associated with metastasis formation in case of lung cancer and it was successfully  
306 demonstrated that depletion of macrophage cPLA2 by gene knock out resulted in the significant  
307 decrease of metastatic potential (Weiser-Evans, Wang et al. 2009). In conclusion, the macrophage  
308 infiltration clearly shown on Fig. 4A is likely to confer sufficient PLA2 activity to trigger EMT and  
309 downstream metastasis formation in the corresponding group. Although the involvement of gut  
310 microbiota is not obvious in the current case, bacterial PGs, as the main constituents of prokaryotic  
311 cellular membranes can potentially contribute to the expression of macrophageal PLA2 through TLR2  
312 pathway, especially in the proximity of necrotic areas.

313 From analysis of the weakly preserved module between the metastatic and non-metastatic related  
314 tissue samples at 10cm from the tumor core, it was found that the PUFAs octadecadienoic acid,  
315 eicosenoic acid, eicosadienoic acid and eicosatetraenoic acid were correlated mainly with PG, PE and  
316 plasmalogen PE together with PS and PI in sub-regions of epithelial tissue. In this case, the significantly  
317 stronger co-expression levels of the phospholipids determined by their high significance in the  
318 metastatic related tissues can be interpreted as the result of increased activity of a number of enzymes



319 including phospholipase D (PLD). Abnormalities in PLD expression can be responsible for altered cell  
320 proliferation mechanisms (Foster and Xu 2003, Park, Lee et al. 2012). Similarly to the tumor core, a  
321 relatively high correlation of eicosatetraenoic acid with most of the detected phospholipids was  
322 observed in the weakly preserved module, suggesting evidence of PLA2 activity that can be  
323 interpreted as a localized inflammatory condition, also confirmed by the visual inspection of the  
324 corresponding regions in the H&E stained tissues (Fig 4B). This, combined with the abundance of  
325 plasmalogens in the module, implies peroxisomal involvement in metastasis formation. It has recently  
326 been demonstrated that peroxisomal functionality is key for macrophage activation (Di Cara,  
327 Sheshachalam et al. 2017) which can explain the correlation between the peroxisomal metabolic  
328 phenotype represented by the network structures (Fig 5B) and metastatic potential conferred by  
329 macrophage PLA2 activity.

## 330 Conclusions

331 Tumors are characterized by a wide range of metabolic, genetic, and phenotypic properties. This  
332 heterogeneity, expressed at the genetic and epigenetic level, is reflected by the metabolites produced  
333 within cells. In this study, DESI-MSI was shown to be effective for untargeted analysis of the local  
334 metabolism of colorectal cancer tissue. The differences in the correlations between the distribution  
335 of key ions and their preservation in the network modules identified that the increased activity of  
336 PLA2, exploiting the high availability of PG in the surfactant layer in the tumor center, was associated  
337 with a risk of post-surgical distant metastasis formation. The molecular correlations which were not  
338 preserved revealed that eicosanoid precursors in stromal tissue can play a significant role in the  
339 increased cellular proliferation within the tumor core. At 10cm from the tumor center, the altered  
340 peroxisomal metabolic phenotype was found to be associated with the different metastatic potential,  
341 likely *via* a macrophage activation mechanism. Finally, the network approach identified a complex  
342 picture of tumor heterogeneity, confirming that a simple 'presence/absence of ions' approach is not  
343 able to determine the differences between the metabolic pathways.

344 Due to the limited number of patients considered, these results should be considered preliminary and  
345 await confirmation in a larger patient cohort. In future work, the study will be expanded to a larger  
346 number of patients, allowing a more detailed analysis of the metabolic differences associated with a  
347 range of clinical characteristics. Furthermore, MSI data in combination with local genetic expression  
348 identified from spatial ME maps will be included in order to investigate both genetic and metabolic  
349 changes to achieve deeper insight of the nature of tumor heterogeneity and its chemical/metabolic  
350 interactions with the surrounding tissue.

## 351 Materials and Methods

352 DESI imaging data was acquired from sections of individual tumor central regions and from section of  
353 tissue at 10cm from the tumor central regions of, respectively, 32 and 29 subjects affected by  
354 colorectal cancer (SI Appendix, Materials and Methods). The tissue specimens were collected after the  
355 surgical removal of the tumor. The subjects were monitored after surgery for a period of up to 6 years,  
356 and events such as disease occurrences (metastases, or local recurrence) and deaths were recorded.  
357 During the observational period, 8 of the 32 subjects and 6 of the 29 subjects developed metastatic  
358 recurrence. The tissue sections were fresh-frozen and mass spectrometry imaging (MSI) data were  
359 acquired using an automated 2D DESI source mounted to a Thermo Exactive Orbitrap mass  
360 spectrometer. MS data were acquired in the negative ion mode, in the range of 200-1,050  $m/z$ . The  
361 RAW spectra, corresponding to tissue regions (pixels) were pre-processed in order to extract a set of

362 variables associated with the informative peaks and their relative abundances. Centroided data were  
363 extracted using the ProteoWizard software (Kessner, Chambers et al. 2008) and pre-processed using  
364 the 'MALDIquant' package for R (Ihaka and Gentleman 1996, Gibb and Strimmer 2012). Before pre-  
365 processing, a re-calibration procedure was applied in order to reduce the peak shift across the pixels  
366 of each tissue sample. The procedure is described in the 'Results' section. The details of the pre-  
367 processing workflow are reported in SI Appendix, Materials and Methods. The tumor core pre-  
368 processed data corresponded to a series of matrices (pixels x ions) containing the intensities of the  
369 185  $m/z$  values common to all the sample pixels. For the samples at 10cm from the tumor, 141  $m/z$   
370 values were found common to all the samples. The consensus adjacency matrix elements were  
371 defined as the minimum of the ions pairwise Pearson's correlations associated with each tissue  
372 section. In a similar fashion, the TOM was calculated using the signed adjacency raised to the soft  
373 power value. Modules were identified by applying the Dynamic Tree Cut hybrid algorithm to the  
374 hierarchical dendrogram with an average linkage obtained using 1-TOM as distance matrix. Module  
375 preservation was performed using the WGCNA '*modulePreservation*' command with 5000  
376 permutations, using the consensus adjacency matrix as input. The module identification procedure  
377 was applied directly on the consensus matrices of the non-metastatic related MSI data for both the  
378 tumor core and 10cm datasets.

379 Datasets and scripts are publicly available at [https://doi.org/10.4121/uuid:f06dee0d-1d2e-4d67-](https://doi.org/10.4121/uuid:f06dee0d-1d2e-4d67-b978-5bac4087d346)  
380 [b978-5bac4087d346](https://doi.org/10.4121/uuid:f06dee0d-1d2e-4d67-b978-5bac4087d346).

## 381 Acknowledgements

382 Full ethical approval was obtained from the institutional review board at Imperial College Healthcare  
383 NHS Trust (REC reference numbers 07/H0712/112, 11/LO/0686). The project was funded by the  
384 European Research Council (ERC Consolidator Grant 'MASSLIP' Contract No: 617896), the National  
385 Institute for Health Research through the Imperial Biomedical Research Centre and Cancer Research  
386 UK Grand Challenge Program (Project title: "A Complete Cartography Through Multiscale Molecular  
387 Imaging").

388

389

390

391

392

393

394

395

396

## 397 References

- 398 Abdelmoula, W. M., B. Balluff, S. Englert, J. Dijkstra, M. J. T. Reinders, A. Walch, L. A. McDonnell and  
399 B. P. F. Lelieveldt (2016). "Data-driven identification of prognostic tumor subpopulations using  
400 spatially mapped t-SNE of mass spectrometry imaging data." Proceedings of the National Academy of  
401 Sciences **113**(43): 12244-12249.
- 402 Alexandrov, T., M. Becker, O. Guntinas-Lichius, G. Ernst and F. Eggeling (2013). "MALDI-imaging  
403 segmentation is a powerful tool for spatial functional proteomic analysis of human larynx carcinoma."  
404 J Cancer Res Clin Oncol **139**.
- 405 Balluff, B., C. K. Frese, S. K. Maier, C. Schone, B. Kuster, M. Schmitt, M. Aubele, H. Hofler, A. M. Deelder,  
406 A. Heck, Jr., P. C. Hogendoorn, J. Morreau, A. F. Maarten Altelaar, A. Walch and L. A. McDonnell (2015).  
407 "De novo discovery of phenotypic intratumour heterogeneity using imaging mass spectrometry." J  
408 Pathol **235**(1): 3-13.
- 409 Bozza, P. T. and J. P. Viola (2010). "Lipid droplets in inflammation and cancer." Prostaglandins Leukot  
410 Essent Fatty Acids **82**(4-6): 243-250.
- 411 Burrell, R. A., N. McGranahan, J. Bartek and C. Swanton (2013). "The causes and consequences of  
412 genetic heterogeneity in cancer evolution." Nature **501**(7467): 338-345.
- 413 Chen, C., L. Cheng, K. Grennan, F. Pibiri, C. Zhang, J. A. Badner, C. Members of the Bipolar Disorder  
414 Genome Study, E. S. Gershon and C. Liu (2013). "Two gene co-expression modules differentiate  
415 psychotics and controls." Mol Psychiatry **18**(12): 1308-1314.
- 416 Chen, L., H. Fu, Y. Luo, L. Chen, R. Cheng, N. Zhang and H. Guo (2017). "cPLA2alpha mediates TGF-beta-  
417 induced epithelial-mesenchymal transition in breast cancer through PI3k/Akt signaling." Cell Death Dis  
418 **8**(4): e2728.
- 419 Deininger, S.-O., M. P. Ebert, A. Fütterer, M. Gerhard and C. Röcken (2008). "MALDI Imaging Combined  
420 with Hierarchical Clustering as a New Tool for the Interpretation of Complex Human Cancers." Journal  
421 of Proteome Research **7**(12): 5230-5236.
- 422 Di Cara, F., A. Sheshachalam, N. E. Braverman, R. A. Rachubinski and A. J. Simmonds (2017).  
423 "Peroxisome-Mediated Metabolism Is Required for Immune Response to Microbial Infection."  
424 Immunity **47**(1): 93-106 e107.
- 425 DiLeo, M. V., G. D. Strahan, M. den Bakker and O. A. Hoekenga (2011). "Weighted correlation network  
426 analysis (WGCNA) applied to the tomato fruit metabolome." PLoS One **6**(10): e26683.
- 427 Eberlin, L. S., A. L. Dill, A. B. Costa, D. R. Iffa, L. Cheng, T. Masterson, M. Koch, T. L. Ratliff and R. G.  
428 Cooks (2010). "Cholesterol sulfate imaging in human prostate cancer tissue by desorption electrospray  
429 ionization mass spectrometry." Analytical chemistry **82**(9): 3430-3434.
- 430 Eberlin, L. S., I. Norton, A. L. Dill, A. J. Golby, K. L. Ligon, S. Santagata, R. G. Cooks and N. Y. R. Agar  
431 (2012). "Classifying Human Brain Tumors by Lipid Imaging with Mass Spectrometry." Cancer Research  
432 **72**(3): 645-654.
- 433 Foster, D. A. and L. Xu (2003). "Phospholipase D in Cell Proliferation and Cancer." Molecular Cancer  
434 Research **1**(11): 789-800.
- 435 Gibb, S. and K. Strimmer (2012). "MALDIquant: a versatile R package for the analysis of mass  
436 spectrometry data." Bioinformatics **28**(17): 2270-2271.
- 437 Horvath, S., Y. Zhang, P. Langfelder, R. S. Kahn, M. P. Boks, K. van Eijk, L. H. van den Berg and R. A.  
438 Ophoff (2012). "Aging effects on DNA methylation modules in human brain and blood tissue." Genome  
439 Biol **13**(10): R97.
- 440 Huang, K., T. Maruyama and G. Fan (2014). "The naive state of human pluripotent stem cells: a  
441 synthesis of stem cell and preimplantation embryo transcriptome analyses." Cell Stem Cell **15**(4): 410-  
442 415.
- 443 Ihaka, R. and R. Gentleman (1996). "R: A Language for Data Analysis and Graphics." Journal of  
444 Computational and Graphical Statistics **5**(3): 299-314.
- 445 Jones, E. A., A. van Remoortere, R. J. van Zeijl, P. C. Hogendoorn, J. V. Bovee, A. M. Deelder and L. A.  
446 McDonnell (2011). "Multiple statistical analysis techniques corroborate intratumor heterogeneity in  
447 imaging mass spectrometry datasets of myxofibrosarcoma." PLoS One **6**(9): e24913.

448 Kessner, D., M. Chambers, R. Burke, D. Agus and P. Mallick (2008). "ProteoWizard: open source  
449 software for rapid proteomics tools development." *Bioinformatics (Oxford, England)* **24**(21): 2534-  
450 2536.

451 Langfelder, P. and S. Horvath (2008). "WGCNA: an R package for weighted correlation network  
452 analysis." *BMC bioinformatics* **9**(1): 559.

453 Langfelder, P., R. Luo, M. C. Oldham and S. Horvath (2011). "Is My Network Module Preserved and  
454 Reproducible?" *PLOS Computational Biology* **7**(1): e1001057.

455 Langfelder, P., B. Zhang and S. Horvath (2008). "Defining clusters from a hierarchical cluster tree: the  
456 Dynamic Tree Cut package for R." *Bioinformatics* **24**(5): 719-720.

457 Lou, S., B. Balluff, M. A. de Graaff, A. H. Cleven, I. Briaire-de Bruijn, J. V. Bovee and L. A. McDonnell  
458 (2016). "High-grade sarcoma diagnosis and prognosis: Biomarker discovery by mass spectrometry  
459 imaging." *Proteomics* **16**(11-12): 1802-1813.

460 Marusyk, A., V. Almendro and K. Polyak (2012). "Intra-tumour heterogeneity: a looking glass for  
461 cancer?" *Nat Rev Cancer* **12**(5): 323-334.

462 McDonnell, L. A., G. L. Corthals, S. M. Willems, A. van Remoortere, R. J. van Zeijl and A. M. Deelder  
463 (2010). "Peptide and protein imaging mass spectrometry in cancer research." *Journal of proteomics*  
464 **73**(10): 1921-1944.

465 McDonnell, L. A., A. van Remoortere, R. J. M. van Zeijl and A. M. Deelder (2008). "Mass Spectrometry  
466 Image Correlation: Quantifying Colocalization." *Journal of Proteome Research* **7**(8): 3619-3627.

467 Miller, J. A., S. Horvath and D. H. Geschwind (2010). "Divergence of human and mouse brain  
468 transcriptome highlights Alzheimer disease pathways." *Proc Natl Acad Sci U S A* **107**(28): 12698-12703.

469 Murugaesu, N., S. K. Chew and C. Swanton (2013). "Adapting Clinical Paradigms to the Challenges of  
470 Cancer Clonal Evolution." *The American Journal of Pathology* **182**(6): 1962-1971.

471 Oldham, M., S. Horvath and D. Geschwind (2006). "Conservation and Evolution of Gene Co-expression  
472 Networks in Human and Chimpanzee Brains." *Proc Natl Acad Sci USA* **103**.

473 Oldham, M. C., S. Horvath and D. H. Geschwind (2006). "Conservation and evolution of gene  
474 coexpression networks in human and chimpanzee brains." *Proc Natl Acad Sci U S A* **103**(47): 17973-  
475 17978.

476 Park, J. B., C. S. Lee, J.-H. Jang, J. Ghim, Y.-J. Kim, S. You, D. Hwang, P.-G. Suh and S. H. Ryu (2012).  
477 "Phospholipase signalling networks in cancer." *Nat Rev Cancer* **12**(11): 782-792.

478 Rauser, S., C. Marquardt, B. Balluff, S.-O. Deininger, C. Albers, E. Belau, R. Hartmer, D. Suckau, K.  
479 Specht, M. P. Ebert, M. Schmitt, M. Aubele, H. Höfler and A. Walch (2010). "Classification of HER2  
480 Receptor Status in Breast Cancer Tissues by MALDI Imaging Mass Spectrometry." *Journal of Proteome*  
481 *Research* **9**(4): 1854-1863.

482 Schwamborn, K. and R. M. Caprioli (2010). "Molecular imaging by mass spectrometry—looking beyond  
483 classical histology." *Nature Reviews Cancer* **10**(9): 639-646.

484 Schwartz, S. A., R. J. Weil, M. D. Johnson, S. A. Toms and R. M. Caprioli (2004). "Protein profiling in  
485 brain tumors using mass spectrometry." *Clinical Cancer Research* **10**(3): 981-987.

486 Smith, C. A., G. O'Maille, E. J. Want, C. Qin, S. A. Trauger, T. R. Brandon, D. E. Custodio, R. Abagyan and  
487 G. Siuzdak (2005). "METLIN: a metabolite mass spectral database." *Ther Drug Monit* **27**(6): 747-751.

488 Su, Y., J. Wang, M. Shi, X. Niu, X. Yu, L. Gao, X. Zhang, L. Chen and W. Zhang (2014). "Metabolomic and  
489 network analysis of astaxanthin-producing *Haematococcus pluvialis* under various stress conditions."  
490 *Bioresource technology* **170**: 522-529.

491 Tong, M., X. Li, L. Wegener Parfrey, B. Roth, A. Ippoliti, B. Wei, J. Borneman, D. P. McGovern, D. N.  
492 Frank, E. Li, S. Horvath, R. Knight and J. Braun (2013). "A modular organization of the human intestinal  
493 mucosal microbiota and its association with inflammatory bowel disease." *PLoS One* **8**(11): e80702.

494 Weiser-Evans, M. C., X. Q. Wang, J. Amin, V. Van Putten, R. Choudhary, R. A. Winn, R. Scheinman, P.  
495 Simpson, M. W. Geraci and R. A. Nemenoff (2009). "Depletion of cytosolic phospholipase A2 in bone  
496 marrow-derived macrophages protects against lung cancer progression and metastasis." *Cancer Res*  
497 **69**(5): 1733-1738.

498 Xue, Z., K. Huang, C. Cai, L. Cai, C. Y. Jiang, Y. Feng, Z. Liu, Q. Zeng, L. Cheng, Y. E. Sun, J. Y. Liu, S. Horvath  
499 and G. Fan (2013). "Genetic programs in human and mouse early embryos revealed by single-cell RNA  
500 sequencing." Nature **500**(7464): 593-597.

501 Yu, X., X. Niu, X. Zhang, G. Pei, J. Liu, L. Chen and W. Zhang (2015). "Identification and mechanism  
502 analysis of chemical modulators enhancing astaxanthin accumulation in *Haematococcus pluvialis*."  
503 Algal Research **11**: 284-293.

504

505

506

507

508

509

510

511

512

513

514

515

516

517

518

519

520

521

522

523

524

525

526

527

528

529 Tables

| <b><i>Tumor center samples</i></b>  |                             |
|-------------------------------------|-----------------------------|
| <b><i>Age (years):</i></b>          |                             |
| median, range                       | 72, [52, 88]                |
| <b><i>Genre:</i></b>                |                             |
| Female                              | 12 (met = 2, (25%))         |
| Male                                | 20 (met = 6, (75%))         |
| <b><i>Lymph nodes (number):</i></b> |                             |
| median, range                       | 1, [0, 6]<br>met: 2, [0, 6] |
| <b><i>Metastasis:</i></b>           |                             |
| Bones                               | 1                           |
| Liver                               | 6                           |
| Lung                                | 3                           |
| Omental/Peritoneal                  | 4                           |
| <b><i>10cm samples</i></b>          |                             |
| <b><i>Age (years):</i></b>          |                             |
| median, range                       | 72, [55, 87]                |
| <b><i>Genre:</i></b>                |                             |
| Female                              | 11 (met = 1, (17%))         |
| Male                                | 18 (met = 5, (83%))         |
| <b><i>Lymph nodes (number):</i></b> |                             |
| median, range                       | 0, [0, 5]<br>met: 2, [0, 5] |
| <b><i>Metastasis:</i></b>           |                             |
| Bones                               | 1                           |
| Liver                               | 3                           |
| Lung                                | 1                           |
| Omental/Peritoneal                  | 4                           |

530

531 *Table 1 – Patient clinical metadata associated with the two datasets.*

532

533

534

535

536

537



538 Figures

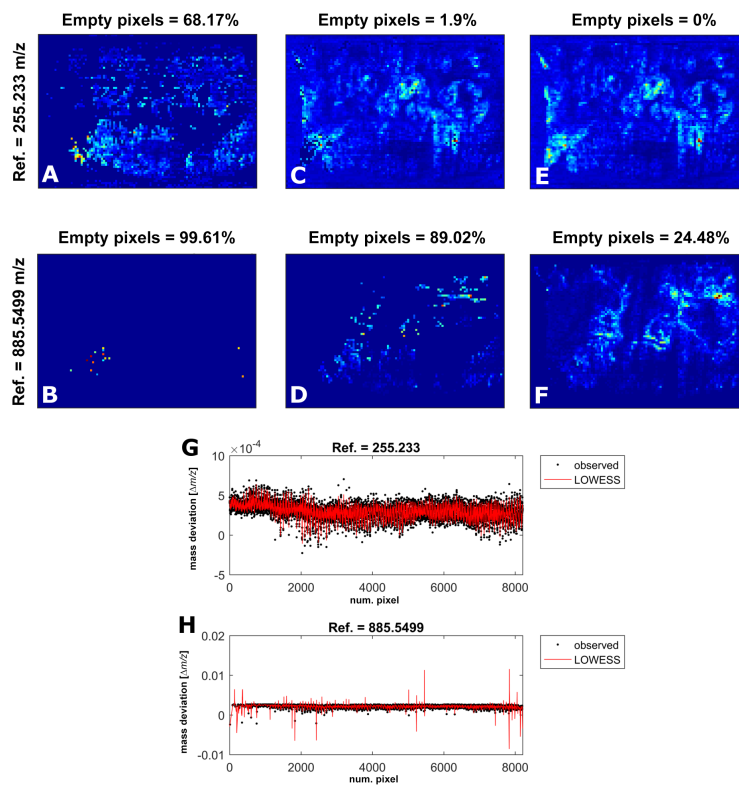

539

540 *Fig. 1 – Effect of the search window width ( $\Delta ppm$ ) on the peaks detected in the raw data. In the*  
541 *example shown in the figure, a  $\Delta ppm$  equal to 1 or 2 is too small compared to the maximum peak shift*  
542 *found in the sample, producing scattered images for both the palmitic acid and PI(38:4) ( $\Delta ppm = 1,$*   
543 *A-B;  $\Delta ppm = 2,$  C-D). In contrast, using the value  $\Delta ppm = 3,$  a peak corresponding to 255.2330 m/z*  
544 *for the full layer (0% empty pixels, E) can be detected and produced an image similar to the stained*  
545 *tissue sample (24.48% empty pixels, F). The robust LOWESS model fitted to the peak shift measured*  
546 *with  $\Delta ppm = 3$  captures the m/z shift across all the pixels (G), whereas it fails to estimate the m/z*  
547 *shift for the peaks corresponding to 855.5499 m/z because of the large number of missing pixels and*  
548 *also because of the gaps related to the localized presence of tissue in the image (H).*

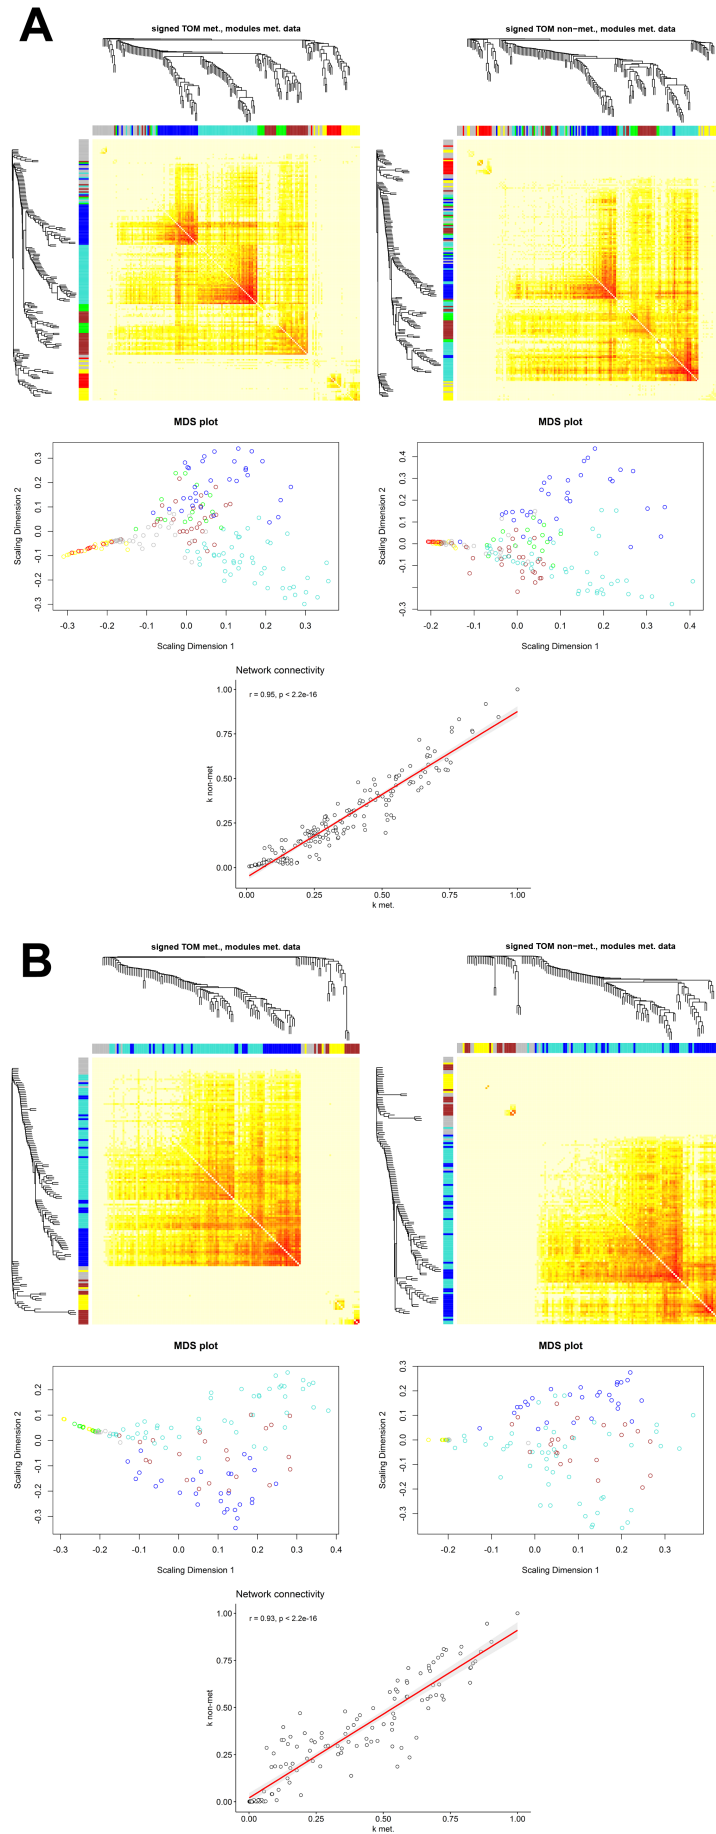

550 *Fig. 2 – Graphical representation of the co-expression networks. Panel A: TOM heatmap with*  
551 *hierarchical clustering results for the metastatic (top left) and non-metastatic (top right) tumor center*  
552 *data; multidimensional scaling (MDS) scatter plot showing the node distribution associated with the*  
553 *module color attributes for the metastatic (center left) and non-metastatic (center right) tumor center*  
554 *data. The high Pearson's correlation value between the network connectivity  $k$  of the metastatic and*  
555 *non-metastatic tumor center data confirms that the two networks are characterized by similar global*  
556 *topological properties. Panel B: Analogous results for the data associated with the tissue sections at a*  
557 *distance of 10cm from the tumor. Figures at left represent the results from the metastatic samples,*  
558 *and figures at right represent the results from non-metastatic samples.*

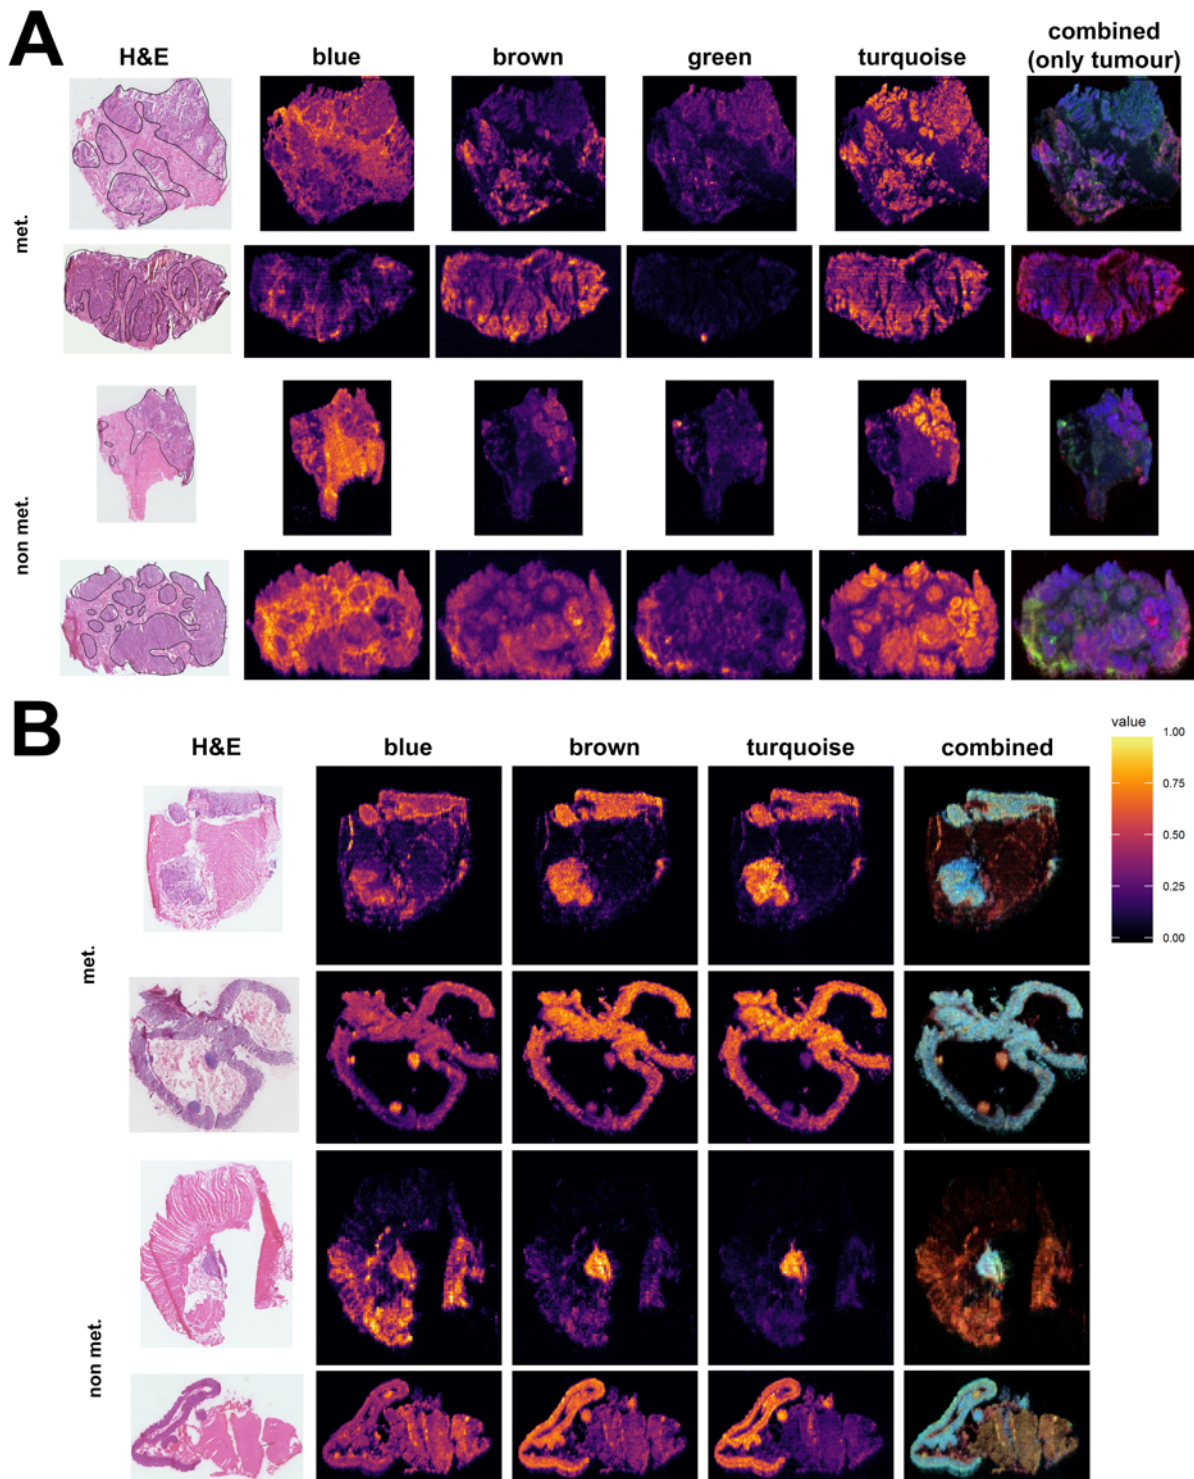

559

560 *Fig 3 – Spatial visualization of the tissue related module eigenmetabolites (ME). Panel A: results for the*  
561 *tumor core samples. The four tissue related modules are localized in different regions of the cancerous*  
562 *tissue, the “blue” module is mainly expressed in the connective tissue surrounding the tumor*  
563 *(delineated by a black line in the H&E image in the first column), whereas the other three modules*  
564 *mostly involve the tumor. The tumor molecular heterogeneity is captured by the modules “brown”,*  
565 *“green” and “turquoise” as shown by the combination of their ME in the last column. Here the three*  
566 *ME expressions are scaled in [0, 1] and visualized as the intensities of RGB channels. Two examples are*  
567 *reported for both the metastatic and non-metastatic samples. Panel B: Analogous results for the tissue*



568 section at 10cm from the tumor center. Here the three tissue related modules are mainly expressed in  
569 the epithelial tissue, as shown by the H&E in the first column. The analogous combination of the ME  
570 into a RGB image shows the molecular heterogeneity captured by WGCNA.

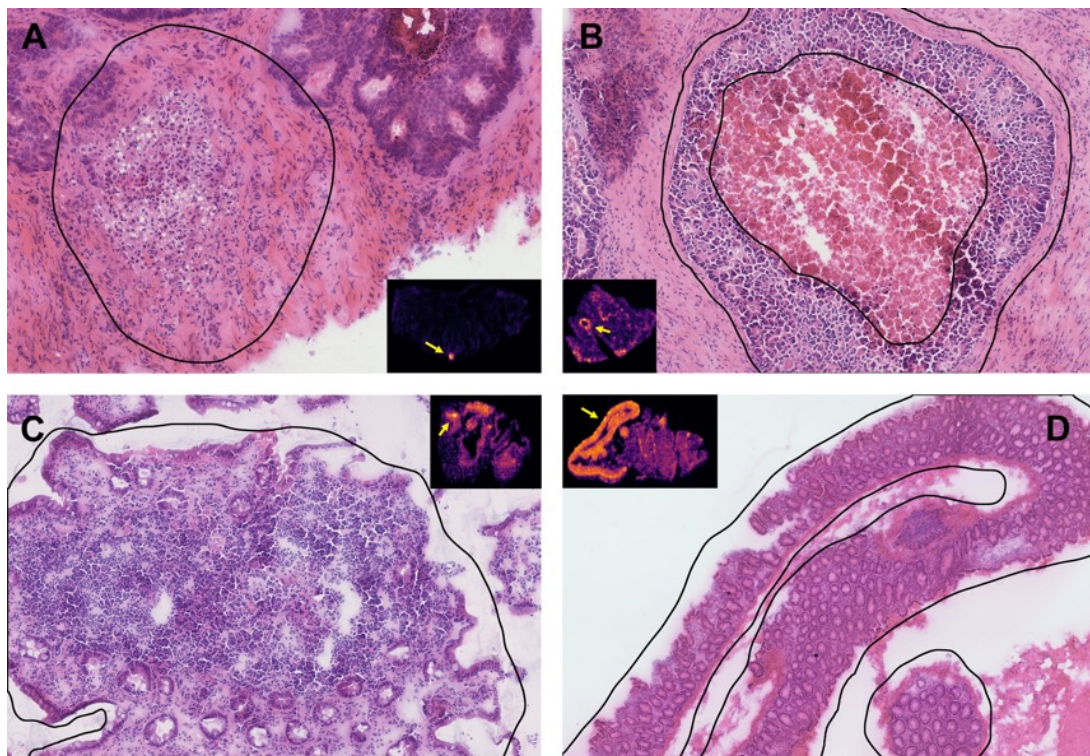

571

572 *Fig. 4 – Examples of the observed tissue associated with the identified modules. In the metastatic tumor*  
573 *center (A), the weakly preserved “green” module ions are localized in the stroma surrounding the*  
574 *tumor. Noticeably macrophages infiltrating the area are visible together with free fat droplets. The*  
575 *latter have been previously associated with an inflammatory response to the infiltration of the tumor*  
576 *cells (Bozza and Viola 2010). In the non-metastatic tumor core, the module ions are still associated*  
577 *with an inflammatory condition that seems to be driven by a necrosis process, as shown in the zoomed*  
578 *H&E stained image corresponding region of the module eigenmetabolites image pointed by the arrow*  
579 *(small box) (B). This observations suggest that different mechanisms are driving the local inflammatory*  
580 *response. Analogously, at a distance of 10cm from the tumor, the weakly preserved “brown” module*  
581 *is localized in sub regions of the metastatic related epithelium involving groups of lymphatic cells as*  
582 *shown by the highly dense cellular populations in the zoomed H&E stained image corresponding to the*  
583 *region pointed by the arrow in the module eigenmetabolites image (small box) (C). A similar result can*  
584 *be observed in the non-metastatic related tissue (D), as represented by the zoomed region of H&E*  
585 *corresponding to the higher intense module eigenmetabolites region. Here, clusters of lymphatic cells*  
586 *are involved in the selected regions of the non-metastatic tissue as well.*

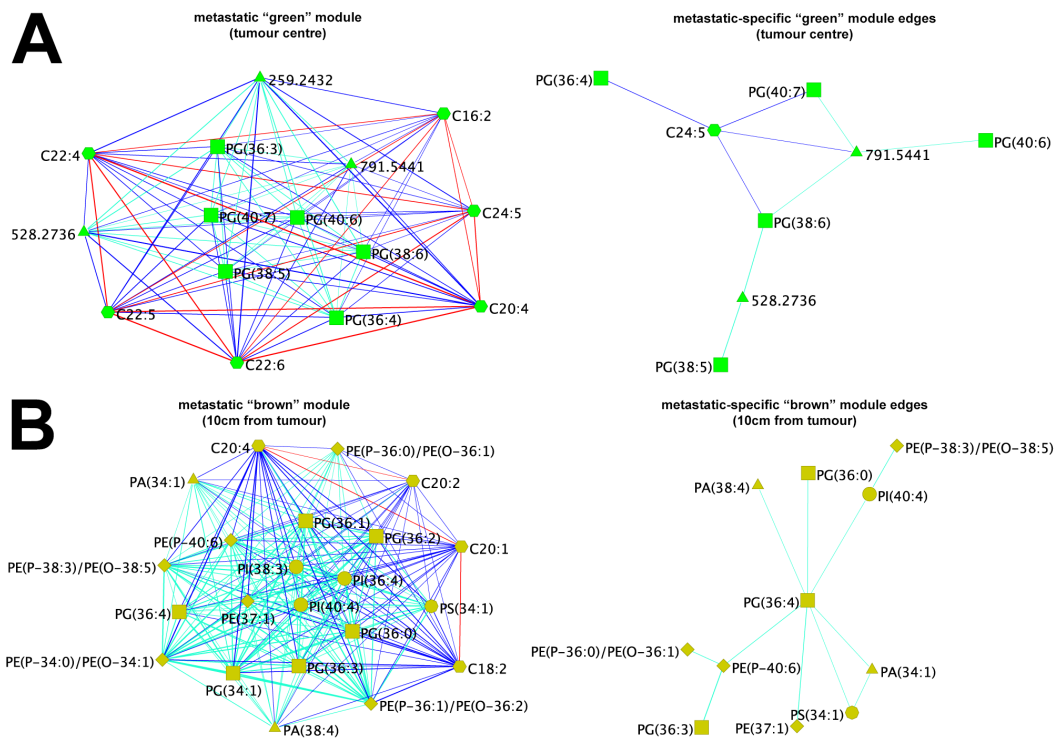

587

588 *Fig. 5 – Graphical representation of the metastatic related modules that are weakly preserved in the*  
 589 *non-metastatic networks. The “green” module associated with the tumor core tissue (panel A, left)*  
 590 *consists of PG and PUFA. The edges connecting the PUFA and the PG are colored in blue, whereas those*  
 591 *connecting PUFA to PUFA are colored in red. A metastatic edge specificity larger than 0.8 reveals that*  
 592 *PG and C24:5 edges are present in the metastatic network but absent in the non-metastatic network*  
 593 *(A, right). Moreover, the higher number of edges involving C24:5 and the ion 791.5441 m/z makes*  
 594 *them the most representative ions of the metastatic-related module. Analogously, the weakly*  
 595 *preserved “brown” module of the network associated with the metastatic 10cm tissue sections reveals*  
 596 *a more complex co-localization pattern involving different families of phospholipids and fatty acids*  
 597 *(panel B, left). In particular, the metastatic-specific module edges ions, in this case, involve mainly*  
 598 *phospholipids, with a central role played by PG(36:4) (panel B, right).*

599
